# Supplementary material for: AS-Quant: Detection and Visualization of Alternative Splicing Events with RNA-seq Data
Source: Int J Mol Sci. 2021 Apr 25;22(9):4468. doi: 10.3390/ijms22094468 (PMC8123109; doi:10.3390/ijms22094468)
Supplement: Supplementary file 1 [file ijms-22-04468-s001.zip › ijms-1169729-SI.pdf]

# AS-Quant: Detection and Visualization of Alternative Splicing Events with RNA-seq Data

Naima Ahmed Fahmi, Heba Nasserreddeen, Jae-Woong Chang, Meeyeon Park,  
Hsin-Sung Yeh, Jiao Sun, Deliang Fan, Jeongsik Yong, and Wei Zhang

April 19, 2021

## 1 Parameters to run flux-simulator (50 million reads)

| Parameters       | Value         | Description                                   |
|------------------|---------------|-----------------------------------------------|
| REF_FILE_NAME    | mm10_ucsc.gtf | GTF reference annotation                      |
| GEN_DIR          | Genome_mm10   | Genomic sequences directory                   |
| NB_MOLECULES     | 10000000      | Number of RNA molecules                       |
| TSS_MEAN         | 100           | Transcript modification parameters            |
| POLYA_SCALE      | 100           |                                               |
| POLYA_SHAPE      | 2             |                                               |
| FRAG_SUBSTRATE   | DNA           | Library Preparation parameters                |
| FRAG_METHOD      | NB            |                                               |
| FRAG_NB_LAMBDA   | 575           |                                               |
| FRAG_NB_M        | 1             |                                               |
| RTRANSCRIPTION   | YES           | Switch on reverse transcription               |
| PCR_DISTRIBUTION | none          | Amplification parameters                      |
| GC_MEAN          | NaN           |                                               |
| GC_SD            | NaN           |                                               |
| PCR_PROBABILITY  | 0.1           |                                               |
| FILTERING        | YES           | Switches size selection On                    |
| UNIQUE_IDS       | TRUE          | Create Unique Read Identifiers for paired-end |
| READ_NUMBER      | 50000000      | Number of reads                               |
| READ_LENGTH      | 76            | Length of each read                           |
| PAIRED_END       | YES           | Paired end reads                              |
| FASTA            | YES           | Generate Fasta file                           |
| ERR_FILE         | 76            | Error model for length 76                     |

## 2 Realtime quantitative PCR (RT-qPCR) analysis and primer sequences

The primer sequences used to measure the expression for transcript isoforms for the genes are following:

mPtbp1 forward: 5'-TGCAGTATGCTGACCCTGTG-3'

mPtbp1 reverse: 5'-AGCTGCACACTCTGATGCTT-3'

mGanab forward: 5'-GATCGATGAGCTAGAGCCCC-3'

mGanab reverse: 5'-TCCAAACCTACAGACGTGGG-3'

Tpm3 forward: 5'-CCGATAGGAAGTATGAAGAGGTGGCTCGTAAG-3'

Tpm3 reverse: 5'-GTCCAGCATCCTTTGTGTACAGAGATGCTC-3'

Camk2g forward: 5'-GAGAAAACCTGAAGGGTGCCATCCTCACAAC-3'

Camk2g reverse: 5'-GTCACAAATCTTCGTGTAGGCCTCAAAGTCC-3'

## 3 Commands for running baselines

### 3.1 SUPPA2

Input:

1. Annotation in GTF format: `annotation.GTF`
2. Event files in .ioe format, generated from the annotation for all five types of alternative splicing and merged them into `annotation.events.ioe`
3. transcript expression files (.tpm) for all six samples (an example) in both conditions.

#### Step 1: Generate event files (input preparation)

```
$ python3 suppa.py generateEvents --pool-genes -i annotation.GTF -o out_file -f ioe -e SE SS MX RI
```

#### Step 2: Prepare transcript expression files (input preparation)

Generate .tpm file for each sample in both conditions, and concatenate all case samples into `all_case_samples.tpm`, and all control samples into `all_control_samples.tpm`

#### Step 3: Get PSI files for both case and control

```
$ python3 suppa.py psiPerEvent -i annotation.events.ioe -e all_case_samples.tpm -o case.PSI
$ python3 suppa.py psiPerEvent -i annotation.events.ioe -e all_control_samples.tpm -o control_PSI
```

#### Step 4: Differential splicing analysis

```
$ python3 suppa.py diffSplice -m empirical -i annotation.events.ioe -p case.PSI.psi control_PSI.psi -e
all_case_samples.tpm all_control_samples.tpm --area 500 --lower-bound 0.05 -me -th 1 -o suppa2_out
```

### 3.2 rMATS

Input: .bam files with 3 replicates (an example) in each group of sequences

```
$ python RNASeq-MATS.py -b1 control_seq1.bam,control_seq2.bam,control_seq3.bam
-b2 case_seq1.bam,case_seq2.bam,case_seq3.bam -t paired -len 76 -gtf gtf_name -o rMATS_out_dir
```

### 3.3 diffSplice

Input: .sam file with 3 replicates (an example) in each group

#### Step 1: Update datafile.cfg in diffSplice directory

```
g1 id1 s1 control_seq1.sam
g1 id1 s2 control_seq2.sam
g1 id1 s3 control_seq3.sam
g2 id1 s1 case_seq1.sam
g2 id1 s2 case_seq2.sam
g2 id1 s3 case_seq3.sam
```

#### Step 2: Run diffSplice command

```
$ diffsplice settings.cfg datafile.cfg diffSplice_dir
```

#### 4 AUC plots for all methods with different types of alternative splicing events

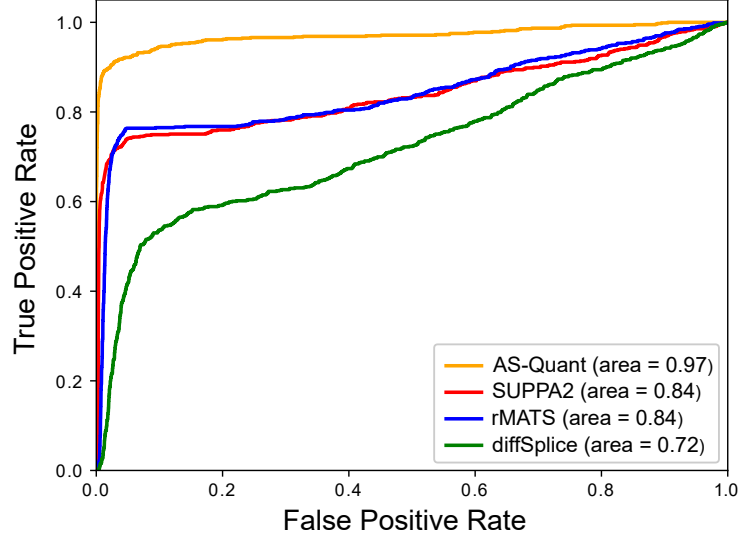

Figure S1: **Simulation experiment (50M reads) to assess the performance of AS-Quant and baseline methods to detect SE events.** The receiver operating characteristic (ROC) curves, i.e., true positive rate against false positive rate, are plotted.

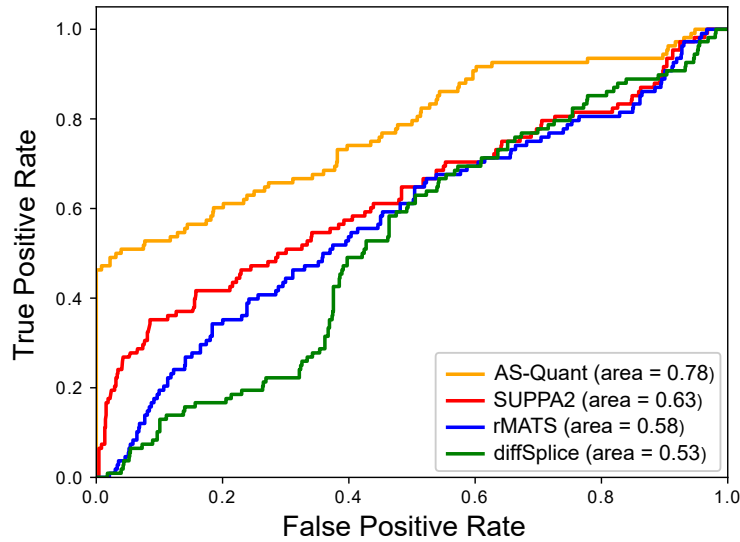

Figure S2: **Simulation experiment (50M reads) to assess the performance of AS-Quant and baseline methods to detect RI events.** The receiver operating characteristic (ROC) curves, i.e., true positive rate against false positive rate, are plotted.

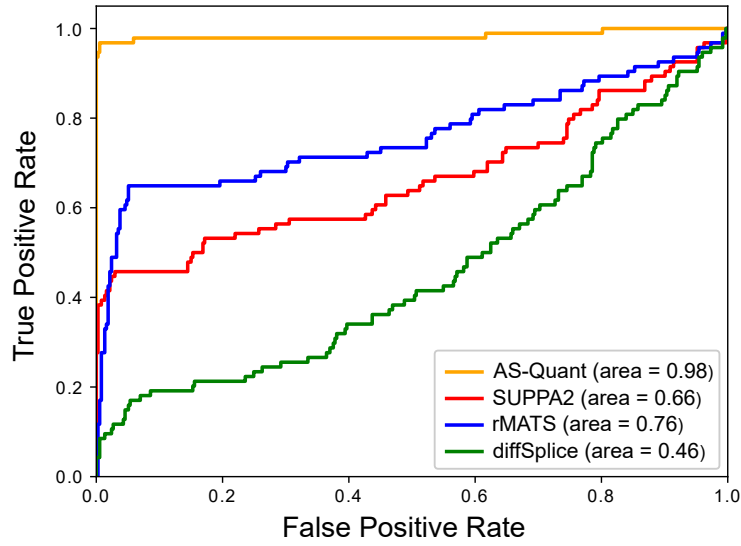

Figure S3: **Simulation experiment (50M reads) to assess the performance of AS-Quant and baseline methods to detect MXE events.** The receiver operating characteristic (ROC) curves, i.e., true positive rate against false positive rate, are plotted.

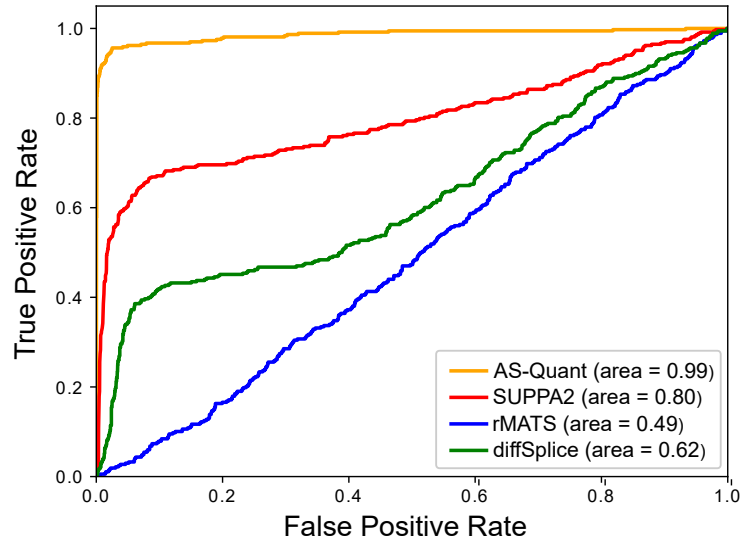

Figure S4: **Simulation experiment (50M reads) to assess the performance of AS-Quant and baseline methods to detect A3SS events.** The receiver operating characteristic (ROC) curves, i.e., true positive rate against false positive rate, are plotted.

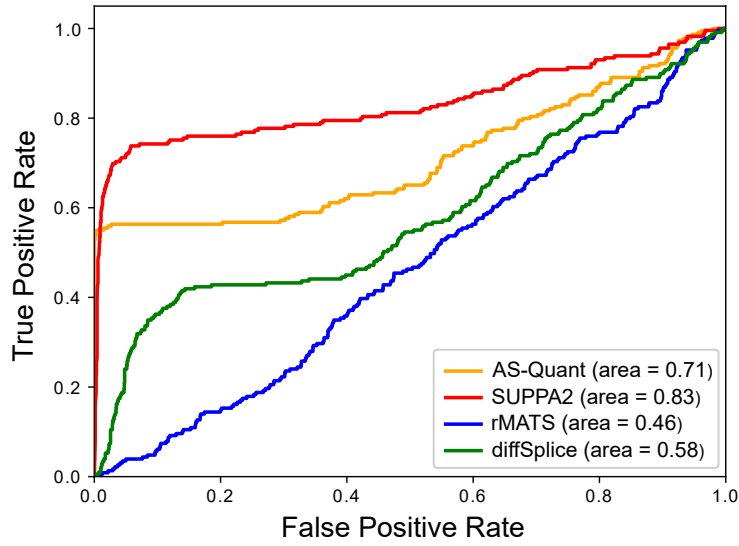

Figure S5: **Simulation experiment (50M reads) to assess the performance of AS-Quant and baseline methods to detect A5SS events.** The receiver operating characteristic (ROC) curves, i.e., true positive rate against false positive rate, are plotted.

## 5 Unannotated alternative splicing event (SE) detected by AS-Quant

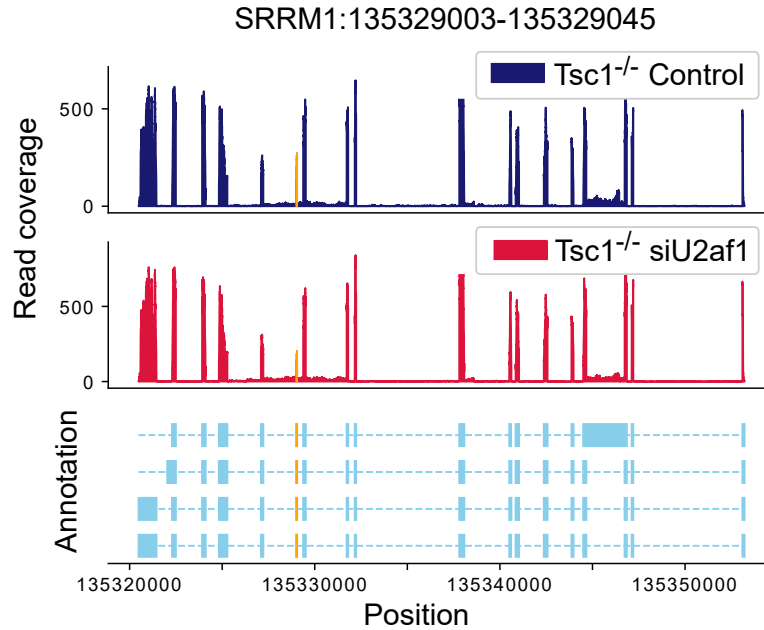

Figure S6: Novel AS event in *SRRM1* identified by AS-Quant. The highlighted exon was not an annotated splicing exon.

## 6 Intron Retention (RI) event generated bt AS-Quant plot

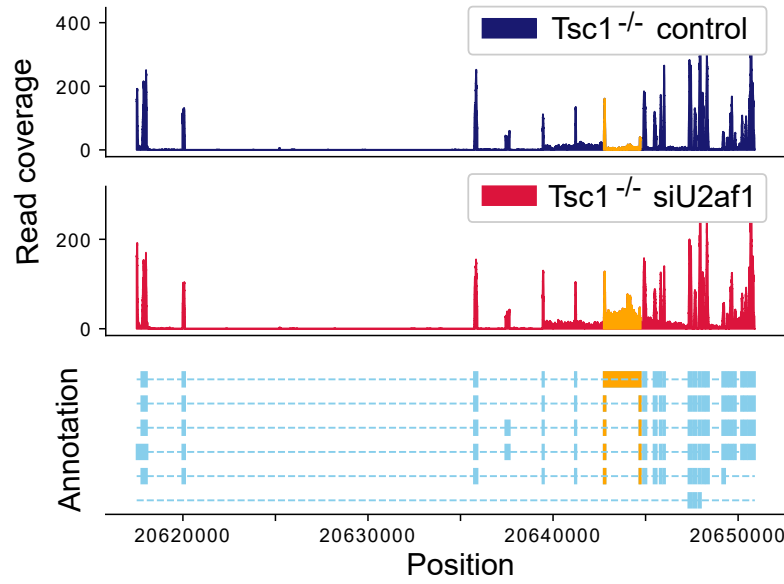

Figure S7: Intron Retention (RI) event in gene *Rbm10* identified and plotted by AS-Quant.

# AS-Quant User Manual

## 1 About

AS-Quant is a computational tool used to detect alternative splicing (AS) events between two biological conditions- specifically, two groups of samples- from RNA-seq data. It can categorize five major types of AS in a comparative and comprehensive manner. AS-Quant also includes a visualization tool which generates plots for both the AS events and the annotation of the whole gene.

## 2 Download

AS-Quant tool can be downloaded directly from <https://github.com/CompbioLabUCF/AS-Quant>. Users need to have Python installed on their machine. It can work on the Windows, Linux and Mac platforms.

## 3 Required tools

1. Python (version 3.0 or higher)
2. Samtools 0.1.8\* [This specific version]

### Required python packages

- matplotlib  
Example Python command: `$ sudo apt-get install python3-matplotlib`
- scipy  
Example Python command: `$ sudo apt-get install python3-scipy`
- pandas  
Example Python command: `$ sudo apt-get install python3-pandas`

## 4 Run AS-Quant

AS-Quant is designed to work on both human (hg19) and mouse (mm10) alternative splicing events. The supplementary data (the five types of alternative splicing target dataset and the annotation) is provided in the project directory in Github.

Users have to run the following two Python files in order to run AS-Quant:

1. *as\_quant.py*: the main function which the users need to run.
2. *make\_plots.py*: generates figures for visual representation of data.

### 4.1 Run as\_quant.py

Command: `$ python3 as_quant.py [options]`

AS-Quant supports the analysis of multiple samples or replicates (in .bam format) in each group. Users can also select the underlying method [-method option] to determine the significance of each

alternative splicing event. Available methods are: chi-squared test (chisquare) and Wilcoxon rank-sum test (ranksum). If there is more than one sample or replicate in each group, Wilcoxon rank-sum test is an additional option to determine the significance of the events.

**List of available options:**  
 (\* refers to a mandatory field)

|         |                                                                                                                                         |
|---------|-----------------------------------------------------------------------------------------------------------------------------------------|
| -i*     | Input directories. The two directories for the two groups of samples in consecutive order.                                              |
| -s*     | Species name: human/mouse                                                                                                               |
| -o      | Output directory                                                                                                                        |
| -novel  | If the user wants to detect both novel and annotated alternative splicing events.<br>Default is annotated only.                         |
| -method | Statistical method to determine the significance of the potential alternative splicing events: chisquare/ranksum. Default is chisquare. |

*as-quant.py* will generate several intermediary files in the output directory. After computing the significance of the association between the two conditions, the final results will be written in the spreadsheet named *group1\_vs\_group2.xlsx*, with five separate sheets for five different splicing types. The following image shows some of the generated fields in *group1\_vs\_group2.xlsx* for event type ‘SE’:

| Chrom | Gene Name | Exon Start | Exon End  | p-value     | Ratio difference | Absolute Ratio | Chrom region Long                | Event |
|-------|-----------|------------|-----------|-------------|------------------|----------------|----------------------------------|-------|
| chr3  | TPM3      | 90091012   | 90091091  | 1.59378E-49 | -0.337998721     | 0.337998721    | chr3:TPM3:90091012-90091091      | SE    |
| chr9  | TPM1      | 67032465   | 67032541  | 3.03007E-47 | 0.172740555      | 0.172740555    | chr9:TPM1:67032465-67032541      | SE    |
| chr6  | IMMT      | 71866725   | 71866740  | 1.78629E-33 | 0.339831533      | 0.339831533    | chr6:IMMT:71866725-71866740      | SE    |
| chr19 | GANAB     | 8907850    | 8907916   | 7.00191E-25 | -0.300771862     | 0.300771862    | chr19:GANAB:8907850-8907916      | SE    |
| chr2  | RBM39     | 156178879  | 156178952 | 9.58374E-24 | 0.218410281      | 0.218410281    | chr2:RBM39:156178879-156178952   | SE    |
| chr10 | RPL41     | 128548657  | 128548680 | 9.80399E-19 | -0.045526444     | 0.045526444    | chr10:RPL41:128548657-128548680  | SE    |
| chr15 | PCBP2     | 102488775  | 102488814 | 1.04201E-18 | 0.095344576      | 0.095344576    | chr15:PCBP2:102488775-102488814  | SE    |
| chr6  | PHB2      | 124716424  | 124716430 | 7.44053E-18 | -0.148651899     | 0.148651899    | chr6:PHB2:124716424-124716430    | SE    |
| chr14 | COMMD6    | 101640287  | 101640299 | 1.01299E-16 | -0.444858768     | 0.444858768    | chr14:COMMD6:101640287-101640299 | SE    |
| chr17 | TCP1      | 12917797   | 12917883  | 1.35496E-16 | 0.109515516      | 0.109515516    | chr17:TCP1:12917797-12917883     | SE    |
| chr1  | FN1       | 71603659   | 71603929  | 1.55266E-16 | 0.107391529      | 0.107391529    | chr1:FN1:71603659-71603929       | SE    |
| chr10 | PTBP1     | 79860116   | 79860194  | 1.0884E-15  | 0.122026419      | 0.122026419    | chr10:PTBP1:79860116-79860194    | SE    |
| chr4  | RSRP1     | 134925776  | 134925821 | 6.80935E-15 | 0.178905209      | 0.178905209    | chr4:RSRP1:134925776-134925821   | SE    |
| chr17 | BAG6      | 35142497   | 35142605  | 1.67888E-14 | 0.186912982      | 0.186912982    | chr17:BAG6:35142497-35142605     | SE    |
| chr9  | SNX14     | 88400722   | 88400749  | 9.89647E-14 | -0.490833183     | 0.490833183    | chr9:SNX14:88400722-88400749     | SE    |
| chr7  | SERPINH1  | 99351823   | 99351867  | 5.41593E-13 | 0.038975242      | 0.038975242    | chr7:SERPINH1:99351823-99351867  | SE    |
| chr17 | EHMT2     | 34905609   | 34905711  | 1.08835E-12 | 0.19051368       | 0.19051368     | chr17:EHMT2:34905609-34905711    | SE    |
| chr11 | RTN4      | 29706409   | 29708770  | 3.74245E-12 | 0.107629852      | 0.107629852    | chr11:RTN4:29706409-29708770     | SE    |
| chr15 | PCBP2     | 102485947  | 102486040 | 5.06984E-12 | 0.087432388      | 0.087432388    | chr15:PCBP2:102485947-102486040  | SE    |
| chr2  | RBM39     | 156177632  | 156177906 | 5.32911E-12 | 0.114285345      | 0.114285345    | chr2:RBM39:156177632-156177906   | SE    |

## 4.2 Running AS-Quant with provided sample input

We provided sample data ‘*sample\_input\_mouse*’ in our GitHub repository to test AS-Quant, where *group1* and *group2* are two directories containing the input bam files.

Command: \$ **python3 as-quant.py -s mouse -i sample\_input\_mouse/group1 sample\_input\_mouse/group2 -o sample\_output**

## 4.3 Run make-plots.py

AS-Quant provides a visualization tool, *make-plots.py*, which generates plots for both the AS events and the annotation of the whole gene. To run the visualization tool, users need to enter the following

command:

```
$ python3 make_plots.py -s species -o output_directory -i input1 input2
```

Example: \$ python3 make\_plots.py -s mouse -i sample\_input\_mouse/group1 sample\_input\_mouse/group2  
-o annotation\_plot

Next, *make\_plots.py* will ask the users to enter the region of interest for which they want to generate the annotation plot. The format should be specific: **Chom:GeneName:RegionStart-RegionEnd**

### parameter descriptions

|             |                                 |
|-------------|---------------------------------|
| Chrom       | Name of the chromosome          |
| GeneName    | Name of the gene                |
| RegionStart | Starting position of the region |
| Region End  | End position of the region      |

Example: **chr1:Tceb1:16641724-16643478**

*make\_plots.py* will generate the read coverage plot for the given gene along with the whole annotation plot with all exons information of that gene. The figure below shows an example of the read coverage plot generated by AS-Quant.

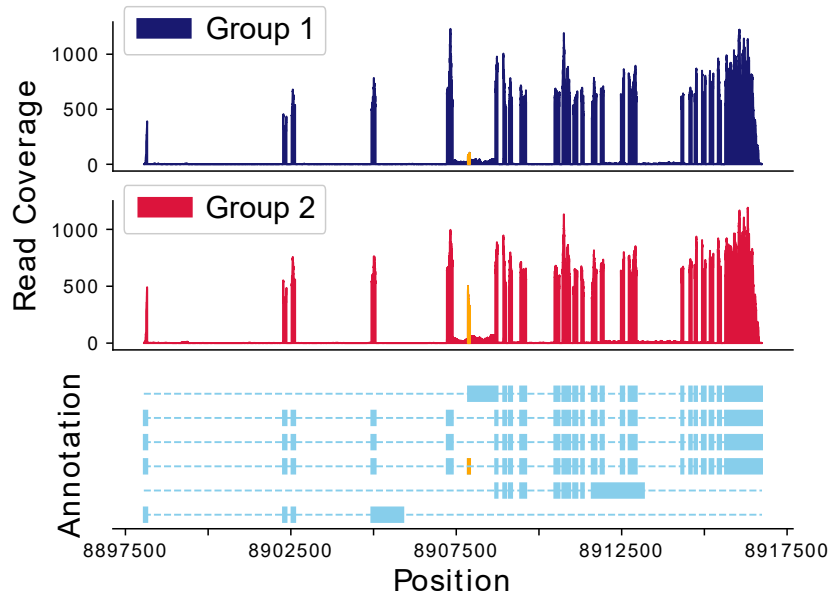

Figure 1: The first two subplots of the figure represent the read coverage of the two biological conditions. The bottom subplot shows the gene annotation and the exon information of that gene.
